# Supplementary material
Source: MDPI journal article supplement (https://www.mdpi.com/1424-2818/14/3/157)
Supplement: s1 [file s1]

Archive with 7 entries (7 files):
- Supplementary Figure S1. Phylogenetic tree of the Oedogoniales species based on 18SrDNA sequences.pdf
- Supplementary Figure S2. Phylogenetic tree of the Oedogoniales species based on 99 single-copy orthogroups by ML method.pdf
- Supplementary Figure S3. Phylogenetic tree of the OCC clade based on 29 single-copy or-thogroups by BI and ML method.pdf
- Supplementary Figure S4. Bar chart showing the KEGG pathways of the 92 putative fast-evolving genes.pdf
- Supplementary Table S1. Partition scheme of the pep sequences of 99 single-copy orthologues used in this study.pdf
- Supplementary Table S2. Accession number of the OCC clade species downloaded from the public database.pdf
- Supplementary Table S3. The putative fast-evolving genes performed by branch model of PAML.pdf
