# Supplementary material
Source: MDPI journal article supplement (https://www.mdpi.com/1424-2818/14/3/157)
Supplement: s1 [file s1]

**Table S1.** Partition scheme of the pep sequences of 99 single-copy orthologues used in this study.

| Subset | Best model   | Partition scheme                                                                                  |
|--------|--------------|---------------------------------------------------------------------------------------------------|
| 1      | JTT+G        | OG0010449, OG0010345                                                                              |
| 2      | LG4M+G       | OG0010460, OG0010353                                                                              |
| 3      | LG+G+F       | OG0010593, OG0010357                                                                              |
| 4      | LG+G         | OG0010545, OG0010369                                                                              |
| 5      | LG4X         | OG0010646, OG0010652, OG0010571, OG0010372, OG0010691, OG0010752, OG0010480, OG0010577, OG0010424 |
| 6      | JTT+G        | OG0010387, OG0010497                                                                              |
| 7      | LG4X         | OG0010648, OG0010689, OG0010521, OG0010400, OG0010748, OG0010491, OG0010656, OG0010392, OG0010790 |
| 8      | LG+G         | OG0010462, OG0010401                                                                              |
| 9      | JTT+G        | OG0010695, OG0010544, OG0010435, OG0010410                                                        |
| 10     | JTT+G        | OG0010412                                                                                         |
| 11     | JTT+G        | OG0010453, OG0010423                                                                              |
| 12     | JTTDCMUT+G   | OG0010508, OG0010438, OG0010528                                                                   |
| 13     | LG4M+G       | OG0010483, OG0010442, OG0010714                                                                   |
| 14     | JTT+G        | OG0010720, OG0010547, OG0010471                                                                   |
| 15     | LG+G         | OG0010698, OG0010672, OG0010621, OG0010479                                                        |
| 16     | LG4X         | OG0010694, OG0010715, OG0010601, OG0010487, OG0010776, OG0010770                                  |
| 17     | JTTDCMUT+I+G | OG0010490                                                                                         |
| 18     | LG4X         | OG0010495                                                                                         |
| 19     | JTT+G        | OG0010702, OG0010498, OG0010573                                                                   |
| 20     | DAYHOFF+G    | OG0010501, OG0010687                                                                              |
| 21     | LG4X         | OG0010699, OG0010523, OG0010793, OG0010833                                                        |
| 22     | JTT+G        | OG0010583, OG0010768, OG0010532                                                                   |

|    |              |                                                                  |
|----|--------------|------------------------------------------------------------------|
| 23 | LG+G+F       | OG0010534                                                        |
| 24 | LG4X         | OG0010788, OG0010551, OG0010745, OG0010588, OG0010606, OG0010610 |
| 25 | JTT+I+G      | OG0010638, OG0010579, OG0010795, OG0010749                       |
| 26 | JTTDCMUT+I+G | OG0010587                                                        |
| 27 | LG4M+G       | OG0010777, OG0010822, OG0010595                                  |
| 28 | LG+G         | OG0010634, OG0010706                                             |
| 29 | JTT+G        | OG0010751, OG0010644, OG0010682                                  |
| 30 | JTT+G        | OG0010693                                                        |
| 31 | LG4M+G       | OG0010722                                                        |
| 32 | LG4M+G       | OG0010746                                                        |
| 33 | LG4M+G       | OG0010758                                                        |
| 34 | JTT+G        | OG0010779                                                        |
| 35 | FLU+G        | OG0010794                                                        |
| 36 | LG4X         | OG0010801                                                        |
| 37 | LG4X         | OG0010823, OG0010829                                             |

---
