# Supplementary material
Source: MDPI journal article supplement (https://www.mdpi.com/1424-2818/14/3/157)
Supplement: s1 [file s1 › Supplementary Table S2. Accession number of the OCC clade species downloaded from the public database.pdf]

**Table S2.** Accession number of the OCC clade species downloaded from the public database.

| <b>Species name</b>             | <b>Accession number</b> |
|---------------------------------|-------------------------|
| <i>Oedogonium cardiacum</i>     | ERX2100078              |
| <i>Oedogonium foveolatum</i>    | ERX2100079              |
| <i>Chaetopeltis orbicularis</i> | ERX2100067              |
| <i>Fritschiella tuberosa</i>    | ERX2100068              |
| <i>Stigeoclonium helveticum</i> | ERX2100071              |
| <i>Uronema belkae</i>           | ERX2100072              |
| <i>Aphanochaete repens</i>      | ERX2100073              |
| <i>Uronema</i> sp.              | ERX337133               |
