# Supplementary material
Source: MDPI journal article supplement (https://www.mdpi.com/1424-2818/14/3/157)
Supplement: s1 [file s1 › Supplementary Table S3. The putative fast-evolving genes performed by branch model of PAML.pdf]

**Table S3.** The putative fast-evolving genes performed by branch model of PAML.

| ID        | LnI1         | LnI2       | LRT       | w <sub>back</sub> | w <sub>fore</sub> | P <sub>value</sub> | P <sub>adjust</sub> |
|-----------|--------------|------------|-----------|-------------------|-------------------|--------------------|---------------------|
| OG0011068 | -3819.976557 | -3827.3988 | 14.84439  | 0.05041           | 0.11394           | 0.0001168          | 0.000904851         |
| OG0011073 | -6114.919209 | -6118.9017 | 7.965068  | 0.08226           | 0.0527            | 0.0047689          | 0.014492016         |
| OG0011088 | -2530.032932 | -2532.8276 | 5.589416  | 0.02225           | 0.02017           | 0.0180693          | 0.039080157         |
| OG0011106 | -2179.26494  | -2182.4261 | 6.322396  | 0.04867           | 0.02742           | 0.0119222          | 0.029345722         |
| OG0011107 | -6475.715447 | -6478.6557 | 5.880474  | 0.08088           | 0.04847           | 0.0153097          | 0.035595053         |
| OG0011113 | -16259.53421 | -16277.993 | 36.917906 | 0.0517            | 0.0567            | 1.00E-09           | 9.30E-08            |
| OG0011125 | -11190.51734 | -11197.012 | 12.988554 | 0.0457            | 0.05339           | 0.0003134          | 0.001943086         |
| OG0011132 | -5450.853735 | -5458.7744 | 15.841398 | 0.0279            | 0.02898           | 6.89E-05           | 0.000610071         |
| OG0011136 | -10413.32989 | -10420.477 | 14.294406 | 0.06105           | 0.2037            | 0.0001563          | 0.001144379         |
| OG0011138 | -12830.49681 | -12842.59  | 24.187048 | 0.12124           | 0.22935           | 8.74E-07           | 3.25E-05            |
| OG0011153 | -7364.151818 | -7369.7203 | 11.137012 | 0.08605           | 0.09866           | 0.0008462          | 0.00374755          |
| OG0011160 | -10185.93402 | -10189.536 | 7.204546  | 0.07353           | 0.05245           | 0.0072719          | 0.020808862         |
| OG0011172 | -1652.845827 | -1657.0219 | 8.352078  | 0.03248           | 0.02868           | 0.0038525          | 0.012497988         |
| OG0011177 | -5764.9506   | -5767.8765 | 5.85185   | 0.09741           | 0.0873            | 0.0155607          | 0.035707017         |
| OG0011181 | -7738.969222 | -7749.6292 | 21.320052 | 0.05765           | 0.04281           | 3.89E-06           | 9.03E-05            |
| OG0011200 | -4915.891937 | -4918.961  | 6.138178  | 0.17493           | 0.11949           | 0.0132294          | 0.031546926         |
| OG0011204 | -10319.38417 | -10327.559 | 16.348842 | 0.0699            | 0.11325           | 5.27E-05           | 0.000544443         |
| OG0011211 | -5612.814653 | -5618.9971 | 12.364882 | 0.06108           | 0.025             | 0.0004375          | 0.002489123         |
| OG0011213 | -11787.39353 | -11795.12  | 15.45393  | 0.04467           | 0.05044           | 8.45E-05           | 0.000714756         |
| OG0011223 | -4384.224586 | -4388.501  | 8.55274   | 0.09078           | 0.07556           | 0.00345            | 0.011667357         |
| OG0011229 | -7417.987626 | -7420.7146 | 5.45386   | 0.05954           | 0.10023           | 0.0195251          | 0.041743403         |
| OG0011231 | -8476.17673  | -8485.0559 | 17.758358 | 0.03881           | 0.05938           | 2.51E-05           | 0.000320094         |
| OG0011232 | -1391.475099 | -1397.2747 | 11.599152 | 0.01575           | 1.00E-04          | 0.0006598          | 0.003068158         |
| OG0011236 | -7654.148211 | -7660.0144 | 11.732416 | 0.06697           | 0.06875           | 0.0006142          | 0.003058511         |
| OG0011237 | -6126.452771 | -6130.1515 | 7.39748   | 0.07245           | 0.11866           | 0.0065315          | 0.018982262         |
| OG0011238 | -2421.466388 | -2425.2043 | 7.475766  | 0.08434           | 0.09026           | 0.0062535          | 0.0184627           |
| OG0011267 | -2813.034178 | -2820.5751 | 15.081788 | 0.00945           | 0.01275           | 0.000103           | 0.000832568         |
| OG0011269 | -5402.756115 | -5424.8948 | 44.277424 | 0.09547           | 0.04961           | 0                  | 0                   |
| OG0011274 | -2243.862463 | -2247.4193 | 7.113752  | 0.06767           | 0.03146           | 0.0076495          | 0.021557637         |
| OG0011286 | -5427.852063 | -5433.6667 | 11.629312 | 0.13104           | 0.21093           | 0.0006492          | 0.003068158         |
| OG0011294 | -4509.234013 | -4517.7053 | 16.942672 | 0.04769           | 0.02357           | 3.85E-05           | 0.000421728         |
| OG0011296 | -1347.913374 | -1351.2956 | 6.764442  | 0.04034           | 0.13244           | 0.0092992          | 0.024022933         |
| OG0011300 | -3402.914355 | -3407.0799 | 8.331092  | 0.04357           | 0.03325           | 0.0038972          | 0.012497988         |
| OG0011302 | -11889.70225 | -11895.552 | 11.700428 | 0.05011           | 0.06675           | 0.0006249          | 0.003058511         |
| OG0011303 | -9729.626834 | -9737.5674 | 15.88109  | 0.07721           | 0.18724           | 6.74E-05           | 0.000610071         |
| OG0011305 | -4544.426931 | -4553.2787 | 17.70357  | 0.07838           | 0.04056           | 2.58E-05           | 0.000320094         |
| OG0011315 | -9595.734241 | -9599.0547 | 6.640932  | 0.06955           | 0.14738           | 0.0099662          | 0.025393275         |

|           |              |            |           |         |          |           |             |
|-----------|--------------|------------|-----------|---------|----------|-----------|-------------|
| OG0011347 | -6267.760532 | -6274.6414 | 13.761758 | 0.04706 | 0.0467   | 0.0002075 | 0.001378512 |
| OG0011352 | -12831.90084 | -12842.788 | 21.774346 | 0.08735 | 0.10335  | 3.07E-06  | 8.15E-05    |
| OG0011358 | -3294.222576 | -3301.2999 | 14.154736 | 0.1087  | 0.16498  | 0.0001684 | 0.001159903 |
| OG0011362 | -5963.028091 | -5967.584  | 9.11173   | 0.34036 | 0.31249  | 0.0025398 | 0.009447892 |
| OG0011365 | -5151.62795  | -5154.3114 | 5.366838  | 0.03339 | 0.03509  | 0.0205231 | 0.042604873 |
| OG0011370 | -5186.378507 | -5189.8731 | 6.989096  | 0.12248 | 0.07118  | 0.0082008 | 0.02210644  |
| OG0011376 | -3844.570615 | -3849.276  | 9.41069   | 0.07697 | 0.12462  | 0.0021572 | 0.00833228  |
| OG0011380 | -6376.466029 | -6379.5543 | 6.176442  | 0.04032 | 0.02301  | 0.0129462 | 0.031272724 |
| OG0011639 | -5602.533647 | -5609.6592 | 14.251104 | 0.05255 | 0.06021  | 0.00016   | 0.001144379 |
| OG0011381 | -3988.678579 | -3993.0654 | 8.77362   | 0.07239 | 0.05238  | 0.0030562 | 0.010931732 |
| OG0011385 | -3729.520507 | -3735.6663 | 12.291604 | 0.03881 | 0.05445  | 0.000455  | 0.002489123 |
| OG0011388 | -3480.906718 | -3486.3661 | 10.91882  | 0.08166 | 0.04432  | 0.0009519 | 0.004117616 |
| OG0011417 | -8285.538685 | -8288.3575 | 5.637632  | 0.03185 | 0.04468  | 0.0175789 | 0.038466844 |
| OG0011420 | -3856.448977 | -3860.5003 | 8.102558  | 0.07403 | 0.0502   | 0.0044203 | 0.013702877 |
| OG0011421 | -2892.92339  | -2896.8943 | 7.941764  | 0.08963 | 0.13281  | 0.0048307 | 0.014492016 |
| OG0011422 | -15323.8458  | -15328.535 | 9.378824  | 0.09833 | 0.11019  | 0.0021951 | 0.00833228  |
| OG0011423 | -6747.852196 | -6756.8195 | 17.93452  | 0.06657 | 0.06384  | 2.29E-05  | 0.000320094 |
| OG0011428 | -8812.660931 | -8821.7768 | 18.231744 | 0.02747 | 0.08986  | 1.96E-05  | 0.000303165 |
| OG0011433 | -6170.750666 | -6177.1701 | 12.838912 | 0.02122 | 0.0154   | 0.0003395 | 0.00203691  |
| OG0011435 | -1600.478433 | -1603.2992 | 5.641556  | 0.01863 | 0.04527  | 0.0175396 | 0.038466844 |
| OG0011439 | -2875.78038  | -2883.7952 | 16.029734 | 0.09161 | 0.03819  | 6.24E-05  | 0.000610071 |
| OG0011454 | -2753.862228 | -2759.0421 | 10.359714 | 0.08917 | 0.08149  | 0.001288  | 0.005444524 |
| OG0011467 | -5513.958605 | -5517.4566 | 6.996046  | 0.07424 | 0.10409  | 0.008169  | 0.02210644  |
| OG0011471 | -4467.885498 | -4471.0416 | 6.31224   | 0.09546 | 0.10179  | 0.0119907 | 0.029345722 |
| OG0011475 | -4483.916446 | -4486.8322 | 5.831488  | 0.05246 | 0.10513  | 0.0157418 | 0.035707017 |
| OG0011480 | -19687.14921 | -19703.924 | 33.549712 | 0.0509  | 0.08109  | 7.00E-09  | 4.34E-07    |
| OG0011484 | -2194.626762 | -2199.0738 | 8.894086  | 0.07249 | 0.06641  | 0.002861  | 0.010434082 |
| OG0011489 | -5299.605897 | -5305.7548 | 12.297834 | 0.05726 | 0.04374  | 0.0004535 | 0.002489123 |
| OG0011491 | -1637.181572 | -1640.1763 | 5.98947   | 0.01062 | 1.00E-04 | 0.0143915 | 0.033883846 |
| OG0011499 | -1522.155749 | -1526.457  | 8.602468  | 0.03406 | 0.00738  | 0.0033571 | 0.011563269 |
| OG0011505 | -3360.510715 | -3364.6902 | 8.358894  | 0.0726  | 0.03053  | 0.003838  | 0.012497988 |
| OG0011510 | -4140.094369 | -4149.9752 | 19.761704 | 0.08868 | 0.10502  | 8.77E-06  | 0.000181288 |
| OG0011530 | -7318.386661 | -7325.0458 | 13.318266 | 0.06253 | 0.06413  | 0.0002628 | 0.001685756 |
| OG0011535 | -1689.2322   | -1692.4651 | 6.46571   | 0.0859  | 0.0151   | 0.0109976 | 0.027642538 |
| OG0011538 | -2536.995684 | -2546.3227 | 18.65405  | 0.11501 | 0.08792  | 1.57E-05  | 0.000264982 |
| OG0011539 | -11307.02819 | -11312.97  | 11.883286 | 0.04291 | 0.02728  | 0.0005664 | 0.002930709 |
| OG0011540 | -4294.142682 | -4296.7554 | 5.225476  | 0.06936 | 0.02843  | 0.0222584 | 0.045000585 |
| OG0011541 | -1651.1743   | -1655.2385 | 8.12836   | 0.04815 | 0.00609  | 0.0043578 | 0.013702877 |
| OG0011546 | -3268.832789 | -3279.7878 | 21.910026 | 0.12425 | 0.02747  | 2.86E-06  | 8.15E-05    |
| OG0011548 | -2844.651975 | -2847.3068 | 5.309678  | 0.0256  | 0.02088  | 0.0212073 | 0.04334674  |

|           |              |            |           |         |         |           |             |
|-----------|--------------|------------|-----------|---------|---------|-----------|-------------|
| OG0011550 | -3156.402716 | -3166.0528 | 19.300082 | 0.09809 | 0.0598  | 1.12E-05  | 0.000207762 |
| OG0011551 | -5286.699435 | -5290.2317 | 7.064586  | 0.03364 | 0.05031 | 0.0078622 | 0.021826539 |
| OG0011556 | -4777.333663 | -4782.0775 | 9.487752  | 0.06829 | 0.04255 | 0.0020685 | 0.008185904 |
| OG0011562 | -3260.896493 | -3263.7594 | 5.725838  | 0.13525 | 0.02481 | 0.0167171 | 0.037462321 |
| OG0011566 | -6471.733617 | -6477.6739 | 11.880544 | 0.11563 | 0.11267 | 0.0005672 | 0.002930709 |
| OG0011570 | -10645.04214 | -10649.393 | 8.700824  | 0.05006 | 0.07449 | 0.0031807 | 0.011162323 |
| OG0011577 | -4703.609492 | -4707.0398 | 6.86055   | 0.08454 | 0.03864 | 0.0088119 | 0.023084806 |
| OG0011598 | -1768.008444 | -1770.7246 | 5.432376  | 0.05571 | 0.17887 | 0.0197668 | 0.04177976  |
| OG0011599 | -9113.757181 | -9127.7487 | 27.982994 | 0.06855 | 0.03103 | 1.22E-07  | 5.67E-06    |
| OG0011602 | -5372.744988 | -5375.4245 | 5.359028  | 0.07534 | 0.02692 | 0.0206153 | 0.042604873 |
| OG0011617 | -4866.270395 | -4871.9259 | 11.310976 | 0.04805 | 0.11112 | 0.0007705 | 0.003495453 |
| OG0011624 | -5834.96282  | -5840.1087 | 10.291776 | 0.0689  | 0.04741 | 0.0013362 | 0.005523142 |
| OG0011626 | -7524.055078 | -7532.5259 | 16.9417   | 0.07146 | 0.04531 | 3.85E-05  | 0.000421728 |
| OG0011628 | -7172.743872 | -7177.508  | 9.52835   | 0.05164 | 0.0694  | 0.0020232 | 0.008180842 |
| OG0011638 | -5217.239889 | -5220.7173 | 6.954894  | 0.06161 | 0.04235 | 0.008359  | 0.022211124 |
