# Supplementary material
Source: MDPI journal article supplement (https://www.mdpi.com/1424-2818/14/3/157)

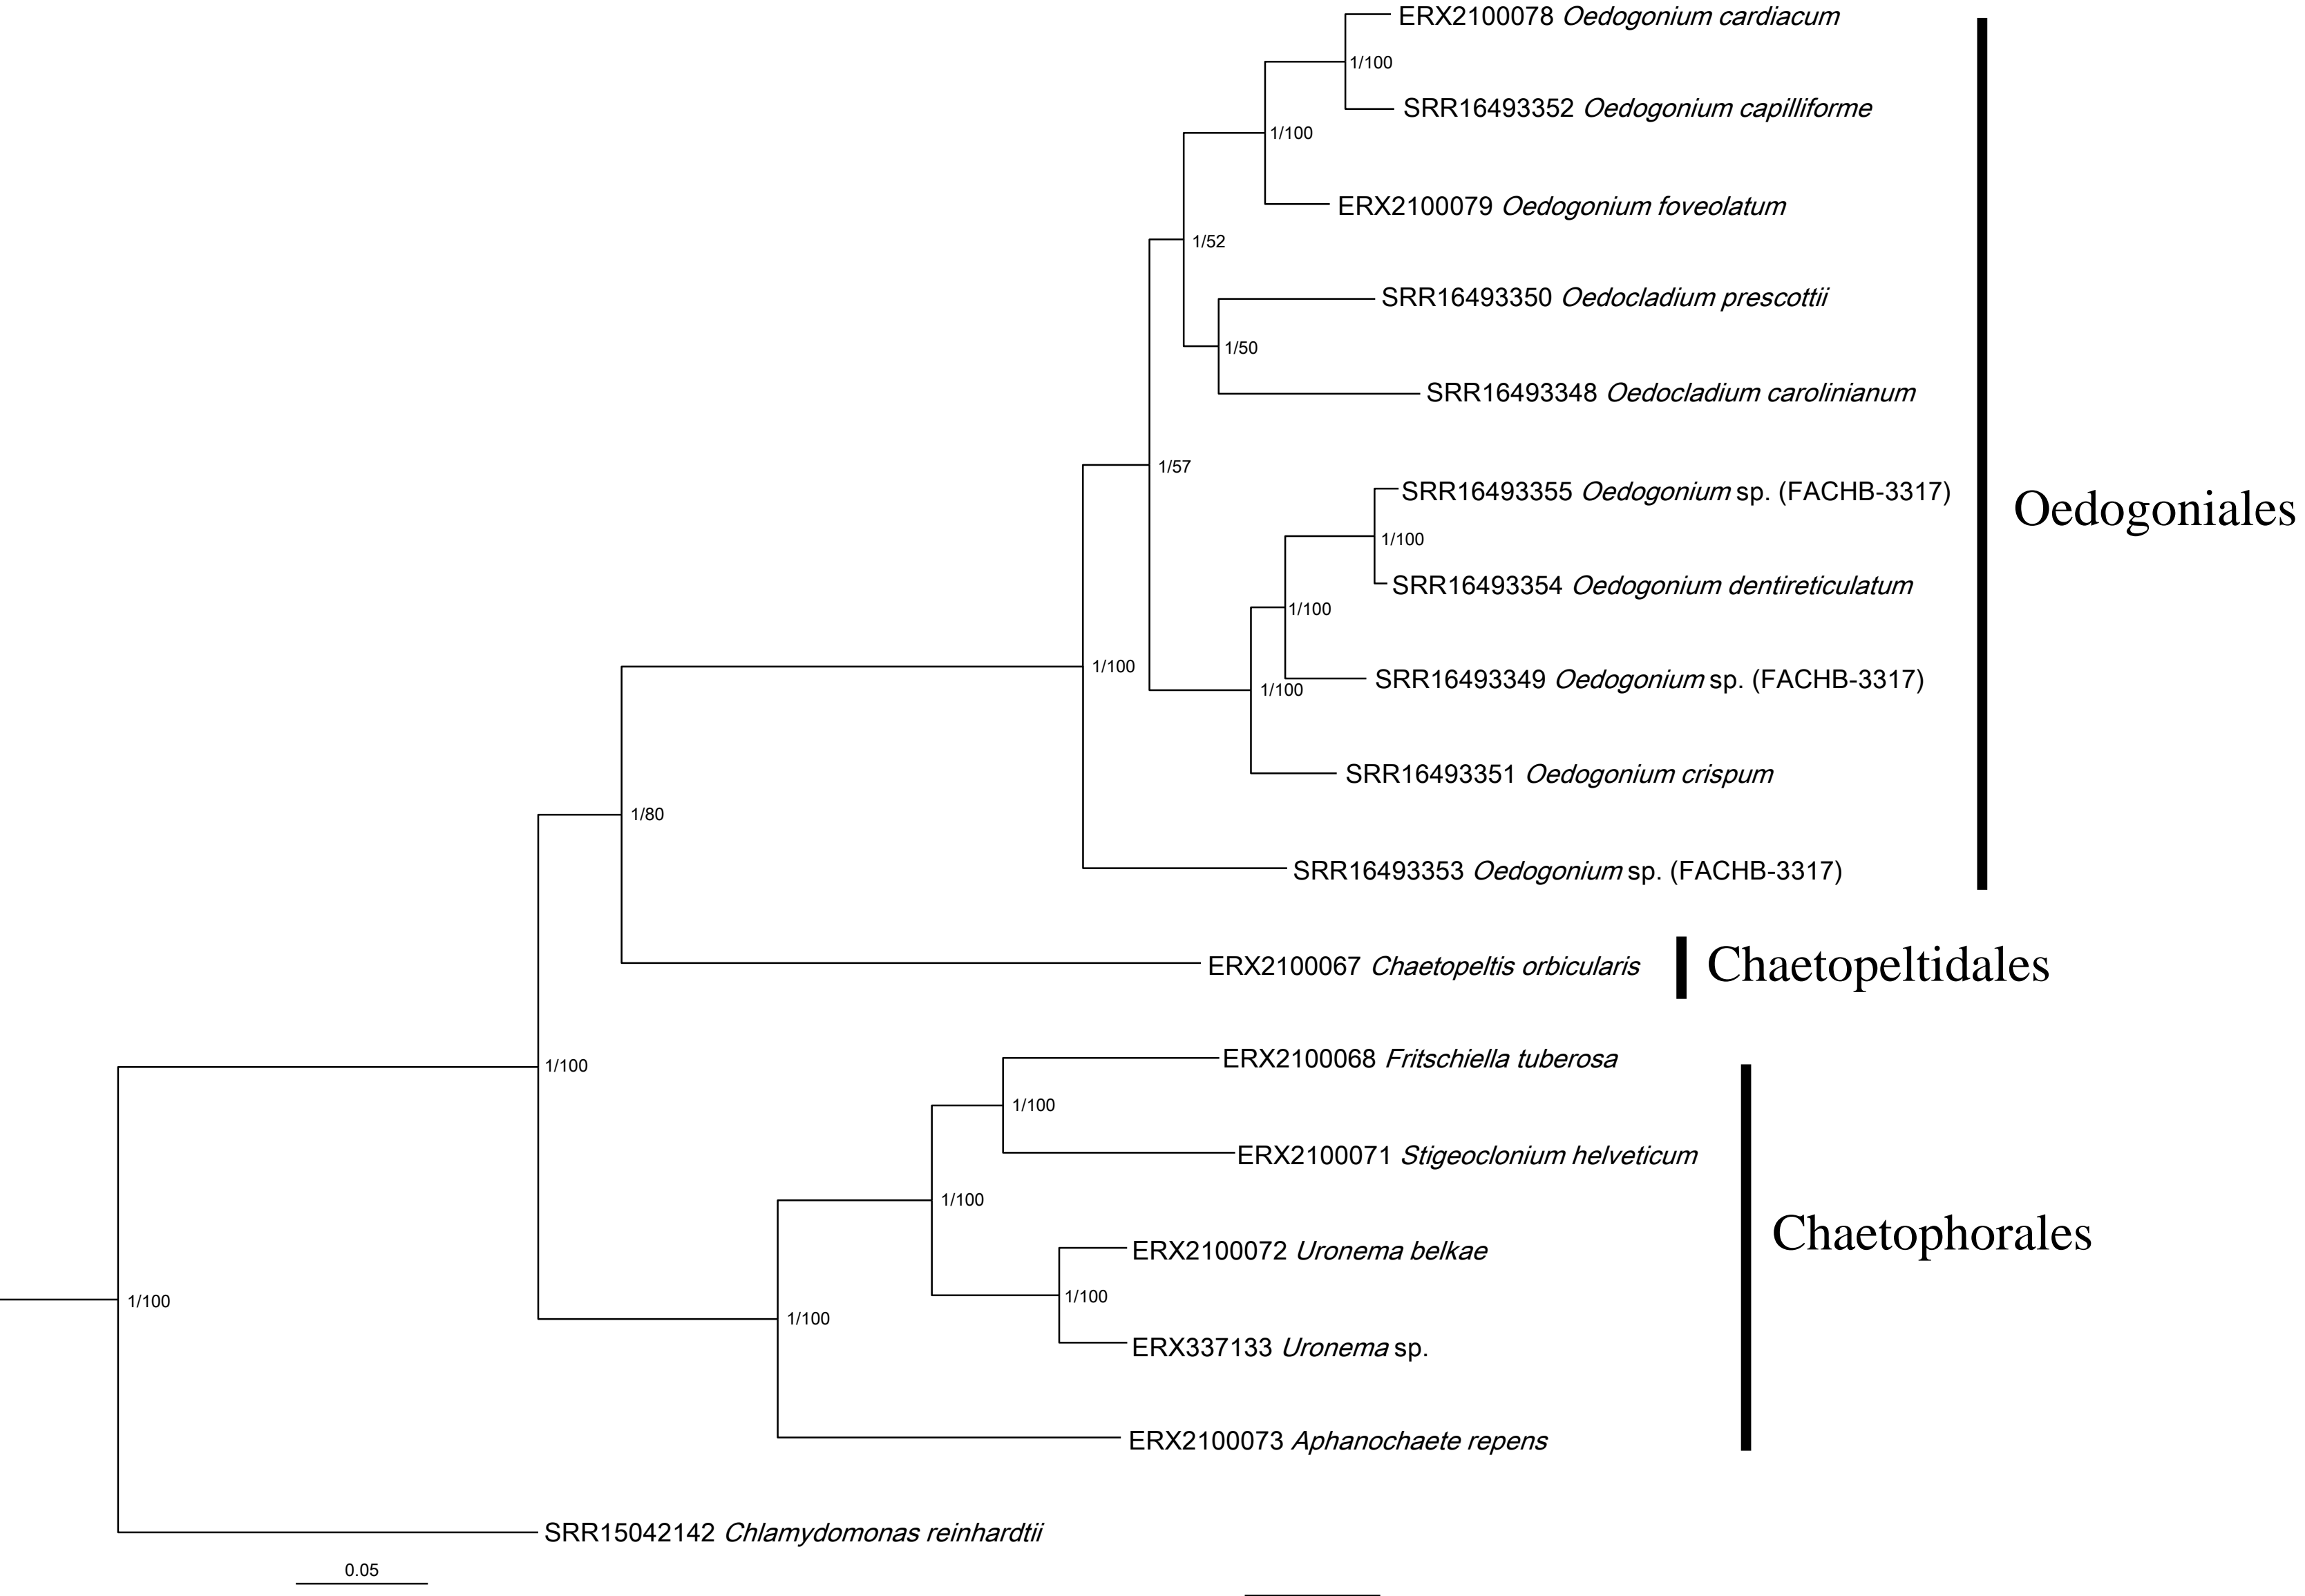

Supplement: s1 [file s1]

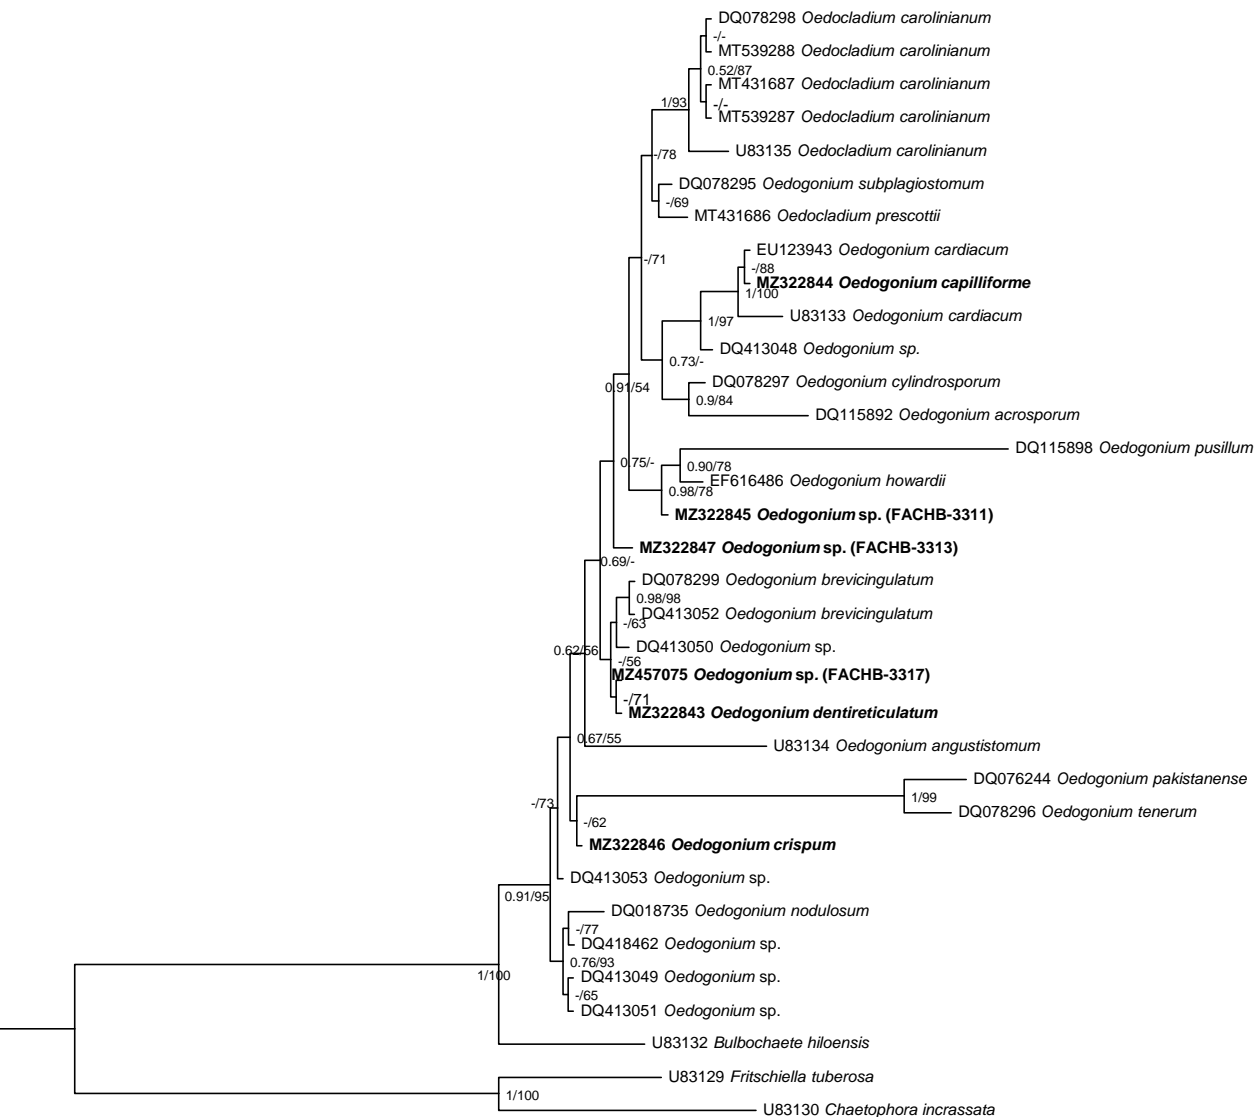

Supplement: s1 [file s1]

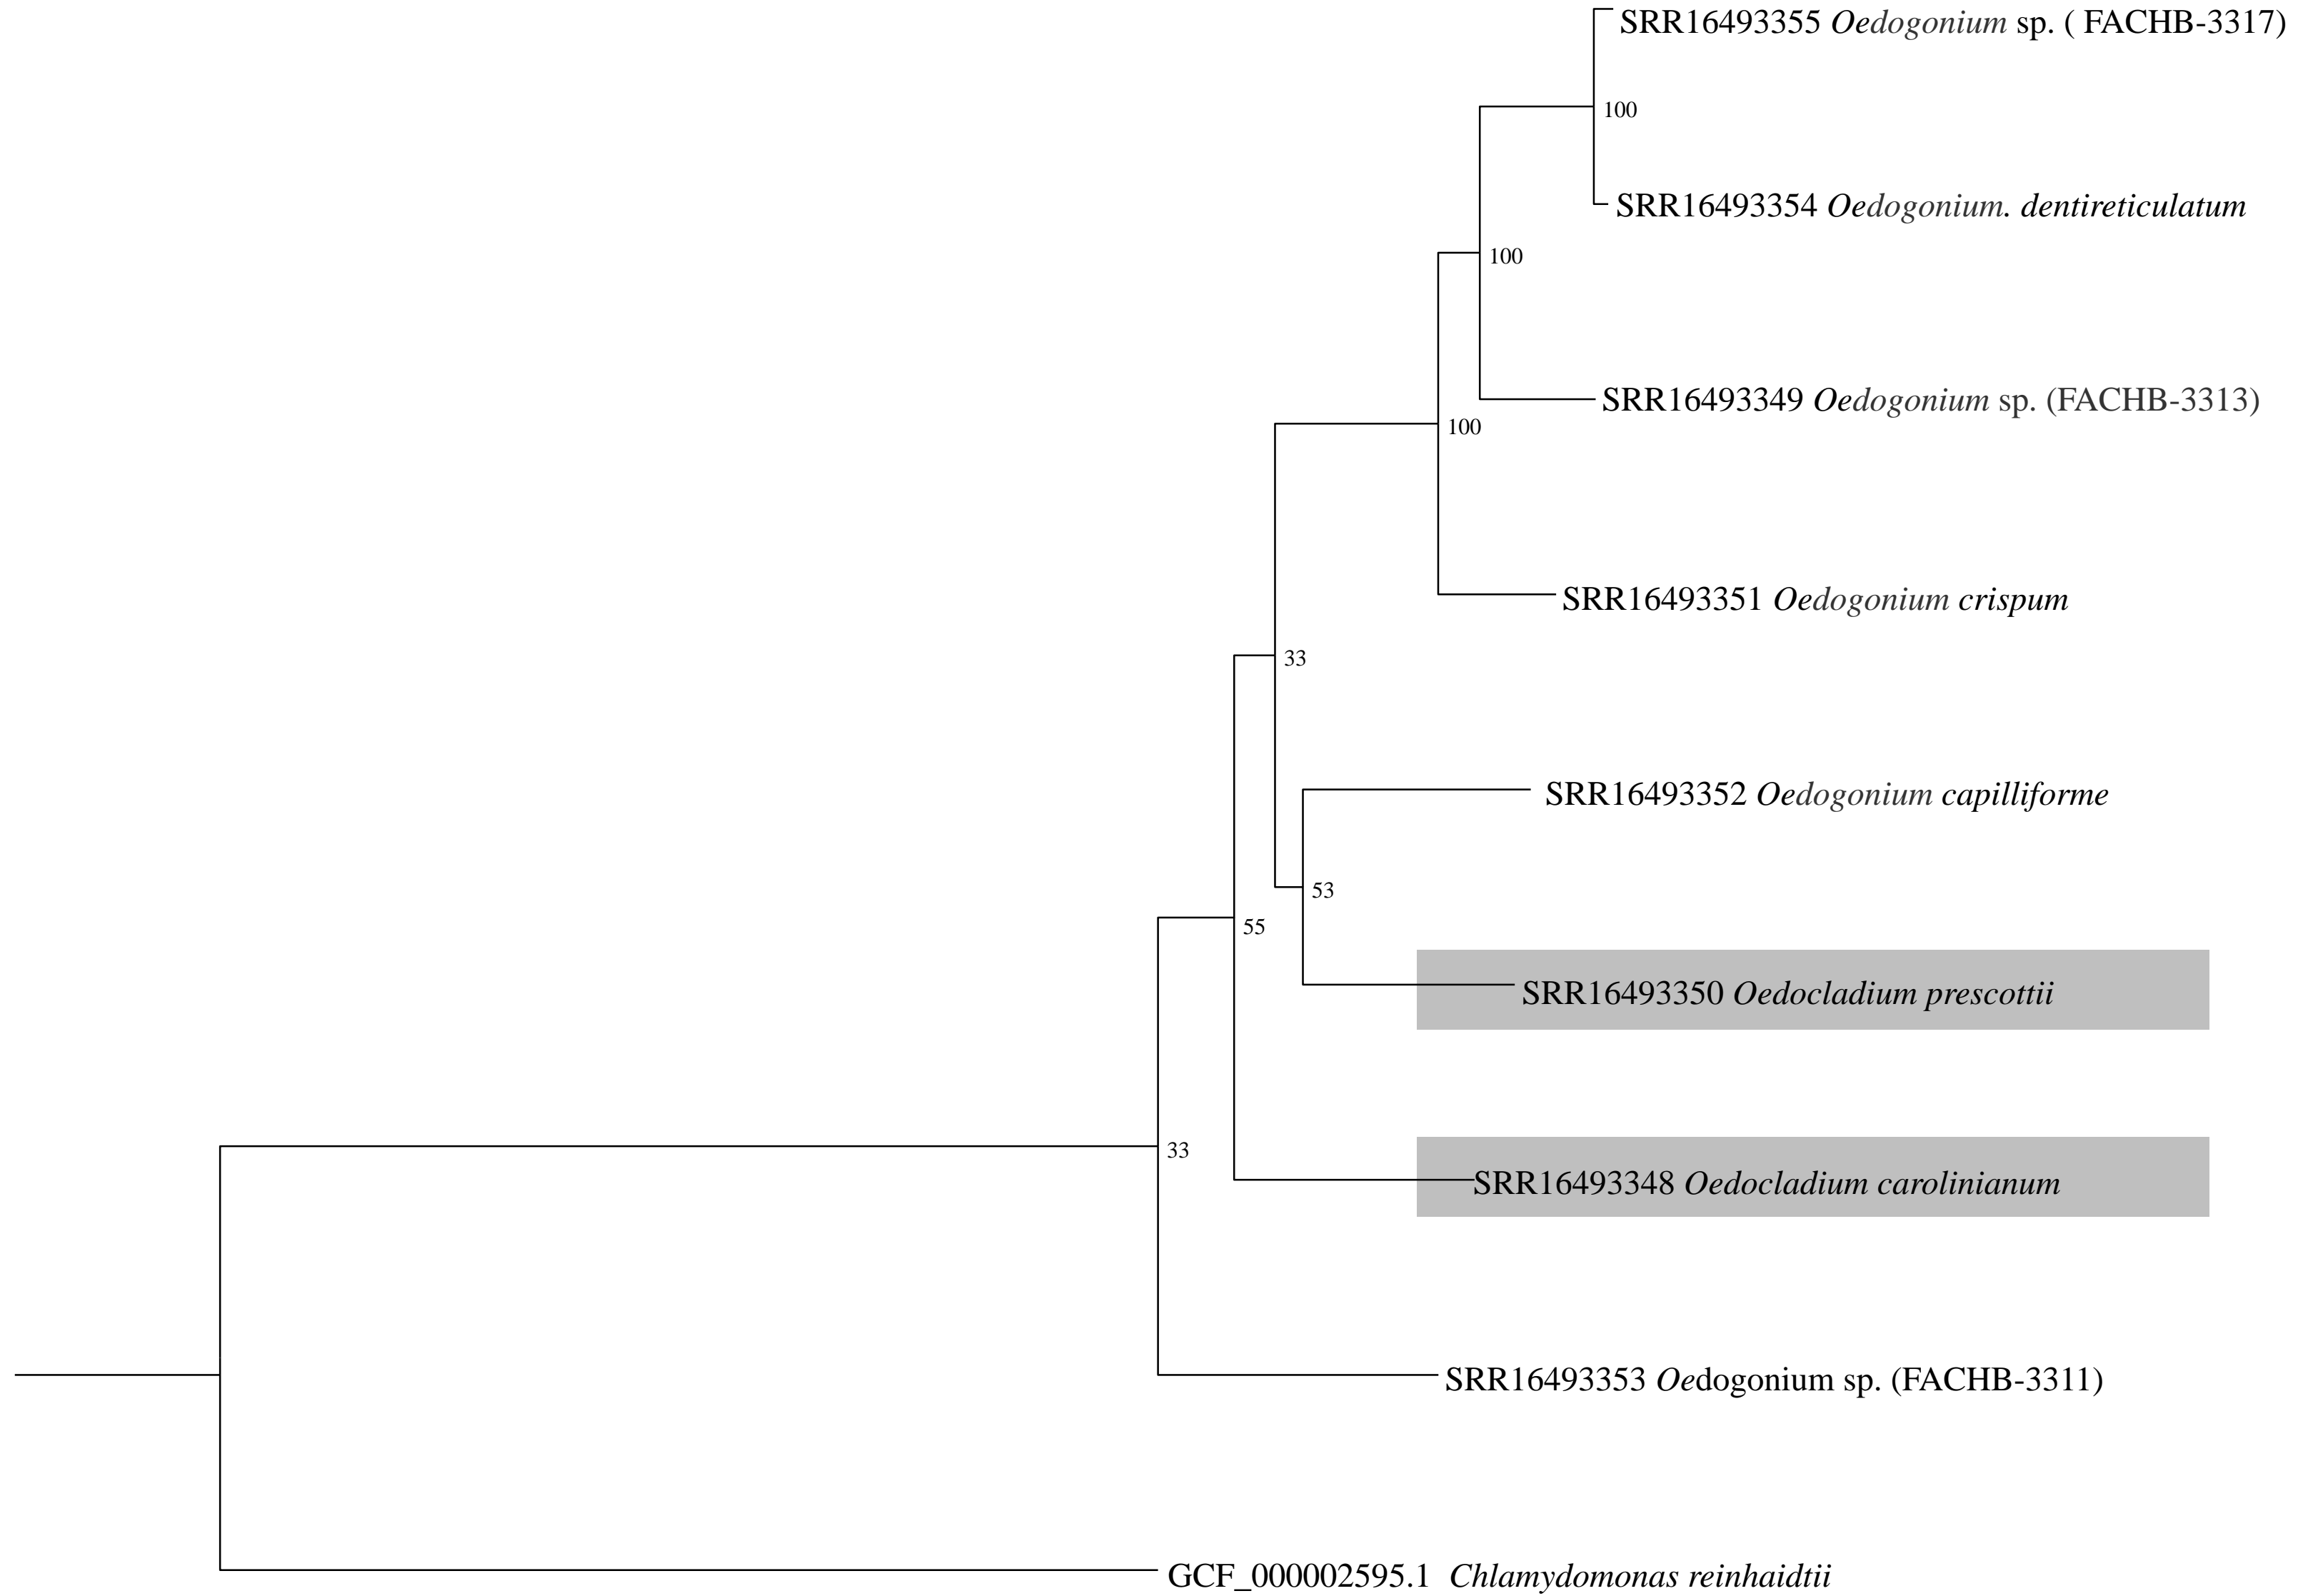

0.2

Supplement: s1 [file s1 › Supplementary Figure S2. Phylogenetic tree of the Oedogoniales species based on 99 single-copy orthogroups by ML method.pdf]

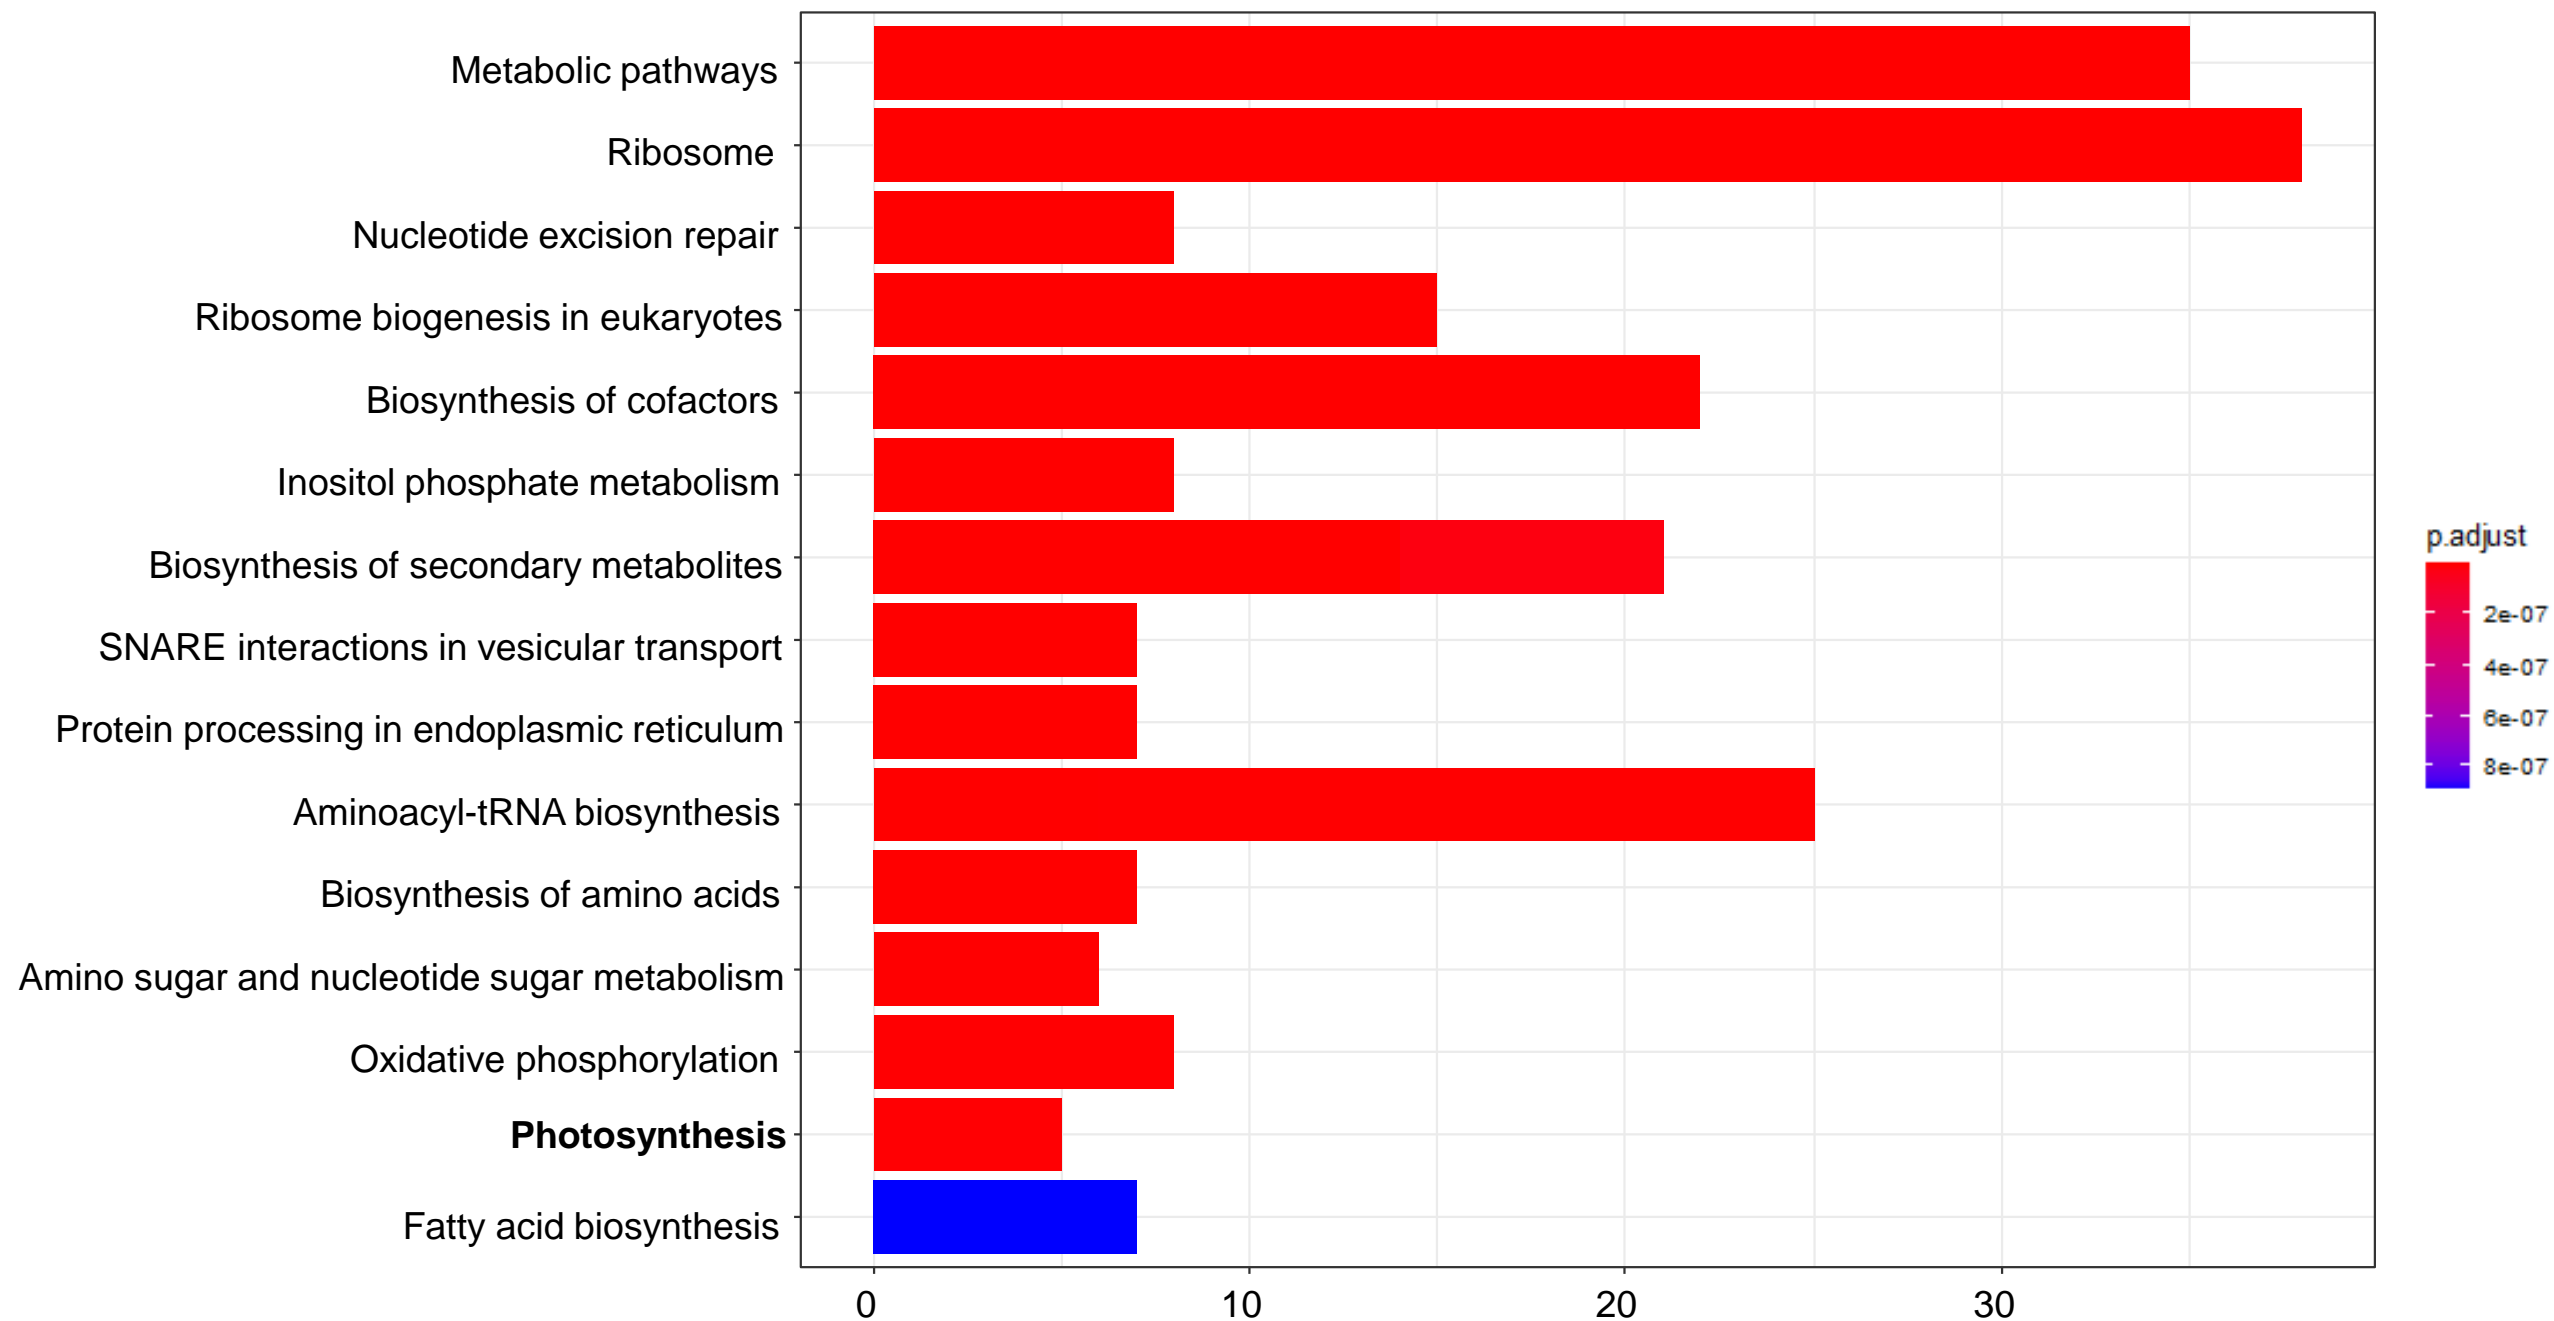

Supplement: s1 [file s1 › Supplementary Figure S4. Bar chart showing the KEGG pathways of the 92 putative fast-evolving genes.pdf]
